# Supplementary material
Source: publisher site journal article supplement (https://www.dovepress.com/article/576692)
Supplement: Supplementary file 1 [file 576692%20Revised%20Table%20S1.docx]

| Variables | Total  (n = 123) | LC→TB  (n = 18) | TB→LC  (n = 35) | TB-LC  (n = 70) | *P* |
| --- | --- | --- | --- | --- | --- |
|
| Treatment plan for lung cancer, n(%) |  |  |  |  | 0.012 |
| Chemotherapy | 22 (17.89) | 1 (5.56) | 3 (8.57) | 18 (25.71) |  |
| Chemotherapy+Immunotherapy | 4 (3.25) | 1 (5.56) | 1 (2.86) | 2 (2.86) |  |
| Chemotherapy+Radiotherapy | 3 (2.44) | 1 (5.56) | 1 (2.86) | 1 (1.43) |  |
| Conservative treatment | 13 (10.57) | 1 (5.56) | 5 (14.29) | 7 (10.00) |  |
| Operation | 51 (41.46) | 6 (33.33) | 20 (57.14) | 25 (35.71) |  |
| Operation+Chemotherapy | 12 (9.76) | 2 (11.11) | 1 (2.86) | 9 (12.86) |  |
| Operation+Chemotherapy+Immunotherapy | 1 (0.81) | 0 (0.00) | 0 (0.00) | 1 (1.43) |  |
| Operation+Chemotherapy+Radiotherapy | 4 (3.25) | 3 (16.67) | 1 (2.86) | 0 (0.00) |  |
| Operation+Chemotherapy+Radiotherapy+Targeted therapy | 1 (0.81) | 1 (5.56) | 0 (0.00) | 0 (0.00) |  |
| Operation+Targeted therapy | 2 (1.63) | 1 (5.56) | 1 (2.86) | 0 (0.00) |  |
| Radiofrequency ablation | 3 (2.44) | 0 (0.00) | 0 (0.00) | 3 (4.29) |  |
| Targeted therapy | 7 (5.69) | 1 (5.56) | 2 (5.71) | 4 (5.71) |  |

**Table S1: Specific data on lung cancer treatment models**
